# Supplementary material for: Atmospheric Trends of CO and CH4 from Extreme Wildfires in Portugal Using Sentinel-5P TROPOMI Level-2 Data
Source: MDPI journal article supplement (doi:10.3390/fire4020025), 2021-05-05
Supplement: s1 [file s1]

# Atmospheric trends of CO and CH<sub>4</sub> from extreme wildfires in Portugal using Sentinel-5P TROPOMI level-2 data

Cátia Magro<sup>1,2\*</sup>, Leónia Nunes<sup>1,3</sup>, Oriana C. Gonçalves<sup>4</sup>, Nuno R. Neng<sup>4,5</sup>, José M.F. Nogueira<sup>4,5</sup>, Francisco Castro Rego<sup>3</sup> and Pedro M. Vieira<sup>1\*</sup>

<sup>1</sup> Department of Physics, NOVA School of Science and Technology, NOVA University Lisbon, 2829-516 Caparica, Portugal; c.magro@fct.unl.pt (C.M.); pmv@fct.unl.pt (P.M.V.)

<sup>2</sup> CENSE – Center for Environmental and Sustainability Research, Department of Environmental Sciences and Engineering, NOVA School of Science and Technology, NOVA University Lisbon, 2829-516 Caparica, Portugal; c.magro@fct.unl.pt

<sup>3</sup> Centre for Applied Ecology “Professor Baeta Neves” (CEABN), InBIO, School of Agriculture, University of Lisbon, Tapada da Ajuda, 1349-017 Lisbon, Portugal; lnunes@isa.ulisboa.pt (L.N.); fcastrorego3@gmail.com (F.C.R.)

<sup>4</sup> Centro de Química Estrutural, Faculdade de Ciências, Universidade de Lisboa, Campo Grande, 1749-016 Lisboa, Portugal; ocgoncalvesp@alunos.fc.ul.pt (O.C.G.); ndneng@fc.ul.pt (N.R.N.); nogueira@fc.ul.pt (J.M.F.N.)

<sup>5</sup> Departamento de Química e Bioquímica, Faculdade de Ciências, Universidade de Lisboa, Campo Grande, 1749-016 Lisboa, Portugal; ndneng@fc.ul.pt (N.R.N.); nogueira@fc.ul.pt (J.M.F.N.)

\* Correspondence: c.magro@fct.unl.pt (C.M.); pmv@fct.unl.pt (P.M.V.)

**Table S1.** Total CO column precision and CH<sub>4</sub> mixing ratio precision data from S5-P TROPOMI in the two geographic locations where the highest CO and XCH<sub>4</sub> emissions were achieved (Figure 3 and 4 related).

|                                     | CO total<br>column<br>precision | CH <sub>4</sub> mixing<br>ratio<br>precision |
|-------------------------------------|---------------------------------|----------------------------------------------|
| <i>Monchique, 2018*</i>             | *                               | #                                            |
| 3 08                                | NaN                             | NaN                                          |
| 4 08                                | NaN                             | NaN                                          |
| 5 08                                | NaN                             | NaN                                          |
| 6 08                                | 0.0014                          | 1.2724                                       |
| 7 08                                | 0.0008                          | -                                            |
| 8 08                                | NaN                             | -                                            |
| 9 08                                | NaN                             | NaN                                          |
| <i>Vila de Rei/Mação,<br/>2019#</i> |                                 |                                              |
| 20 07                               | 0.0012                          | NaN                                          |
| 21 07                               | 0.0011                          | 1.6669                                       |
| 23 07                               | 0.0011                          | NaN                                          |

-Monchique fire - CO point (\*) Lat 37° 16' 58.116" N, Long 8° 27' 17.136" W; CH<sub>4</sub> point (#) Lat 37° 43' 58.008" N, Long 8° 4' 41.232" W

-Vila de Rei/Mação fire - CO point (\*) Lat 39° 41' 20.760" N, Long 8° 2' 4.452" W; CH<sub>4</sub> point (#) Lat 39° 33' 36.252" N, Long 8° 32' 25.404" W

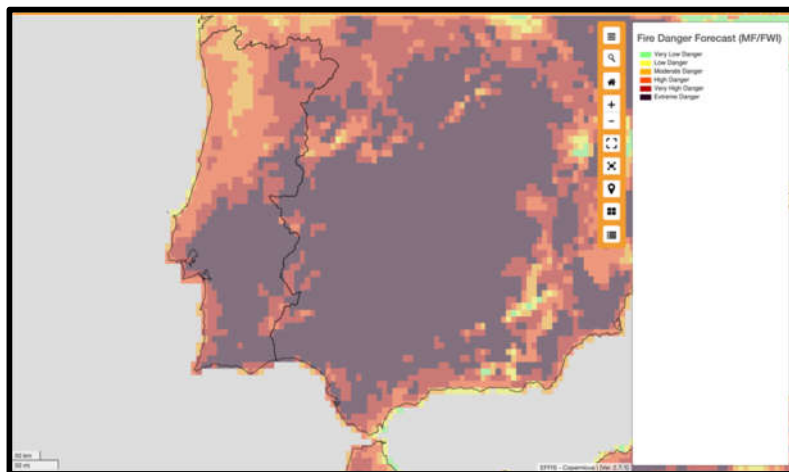

**Figure S1.** Wildfire Danger Forecast for August 7, 2018. (data collect from [https://effis.jrc.ec.europa.eu/apps/effis\\_current\\_situation/public/index.html](https://effis.jrc.ec.europa.eu/apps/effis_current_situation/public/index.html), accessed on 15 March 2021)

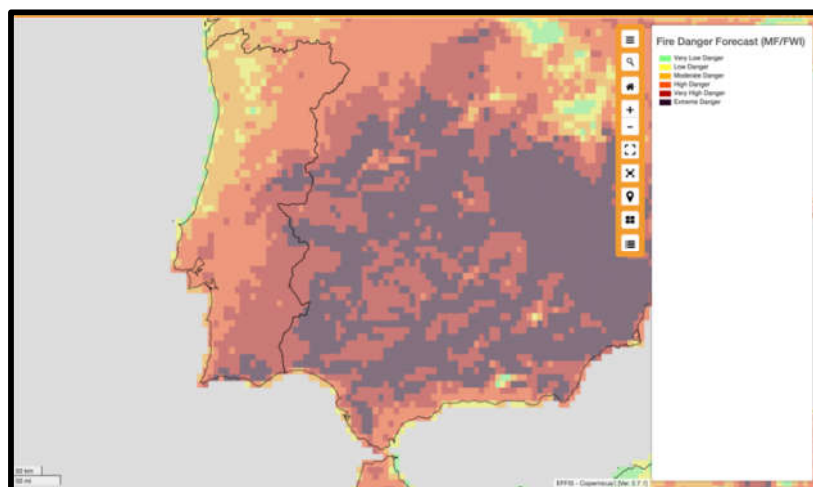

**Figure S2.** Wildfire Danger Forecast for July 21, 2019. (data collect from [https://effis.jrc.ec.europa.eu/static/effis\\_current\\_situation/public/index.html](https://effis.jrc.ec.europa.eu/static/effis_current_situation/public/index.html), accessed on 15 March 2021)

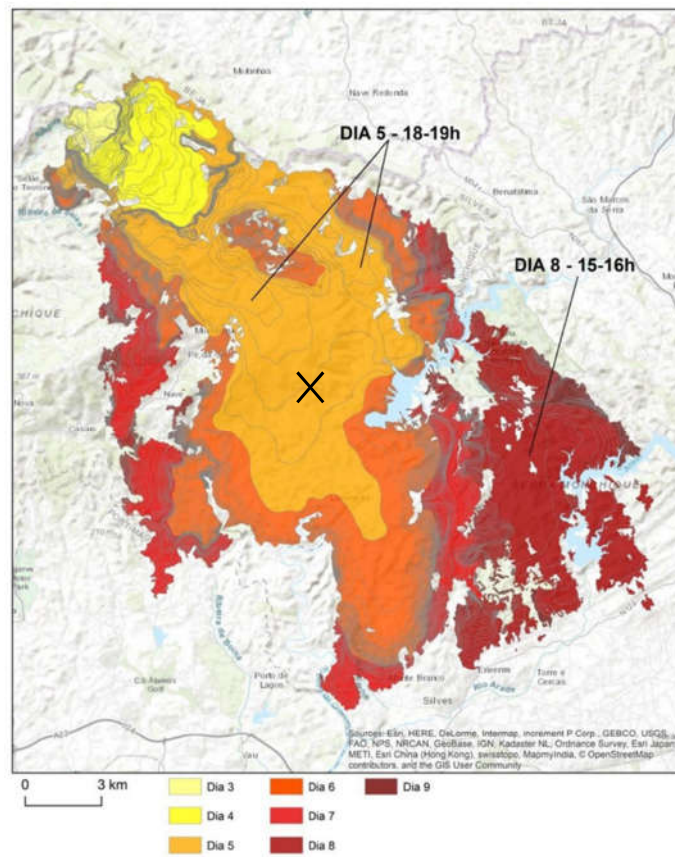

**Figure S3.** Burned area: propagation during Monchique wildfire event [26] (centered at lat 37° 17' 55.644" N, long 8° 30' 35.064" W - represented by the x in the map).

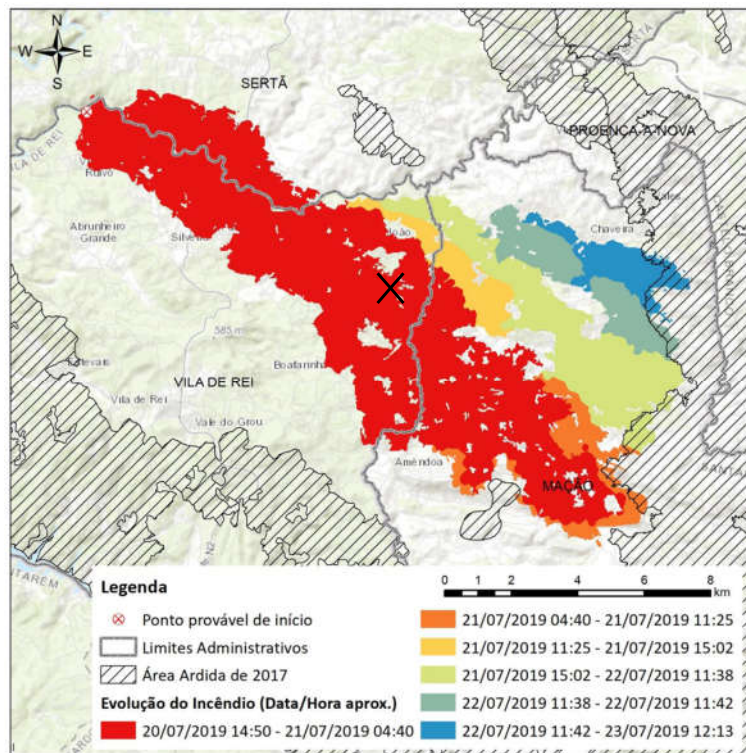

**Figure S4.** Burned area: propagation during Vila de Rei/Mação wildfire event [27] (centered at lat 39° 45' 5.688" N, long 8° 3' 26.172" W - represented by the x in the map).

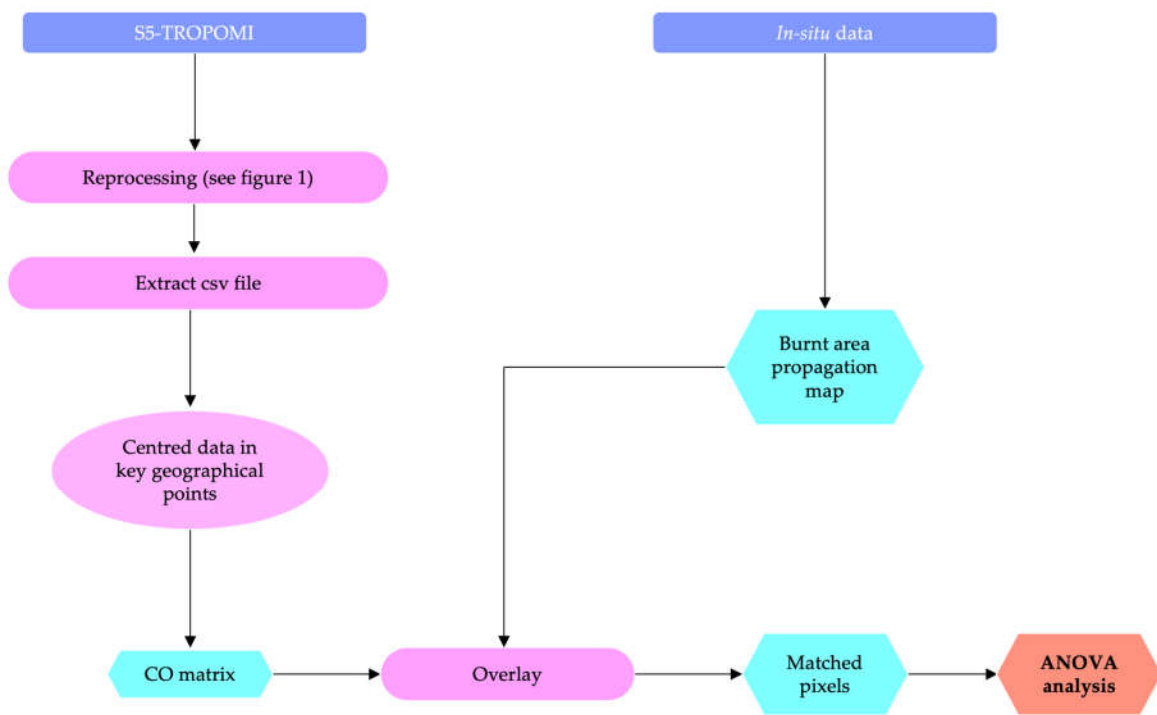

Figure S5. Spatio-temporal analysis flow chart process.

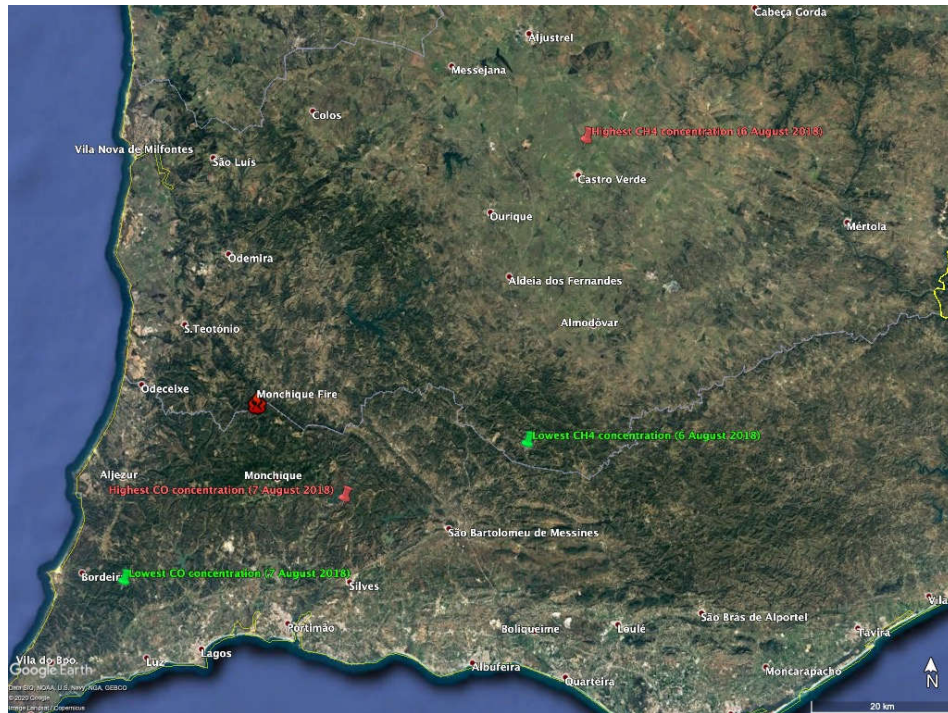

Figure S6. Highest and lowest CO and XCH<sub>4</sub> emissions geographic locations map for Monchique fire.



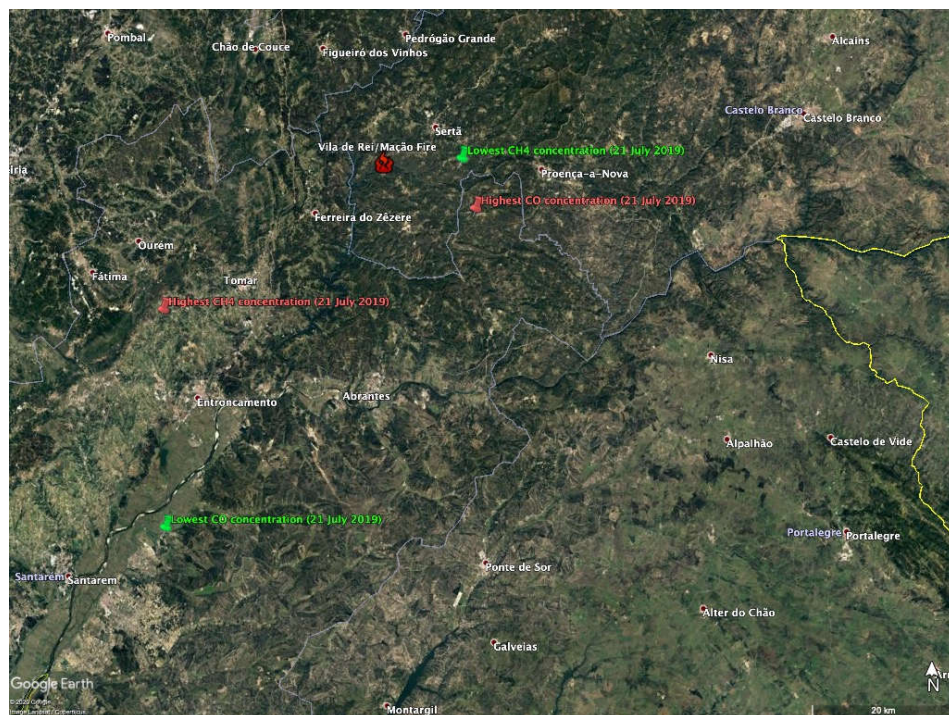

Figure S7. Highest and lowest CO and XCH<sub>4</sub> emissions geographic locations map for Vila de Rei/Mação fire.
